# Supplementary material for: Large-scale probabilistic 3D organization of human chromosome territories
Source: Oxford University Press journal article supplement (doi:10.1093/hmg/ddv479), 2015-11-24
Supplement: ddv479_Supplementary_Data.zip [file ddv479_Supplementary_Data.zip]

Archive with 1 entries (1 files):
- ddv479supp.pdf
